# Supplementary material
Source: publisher figshare collection journal article supplement (https://frontiersin.figshare.com/ndownloader/files/14652461)
Supplement: Supplementary file [file 14652461]

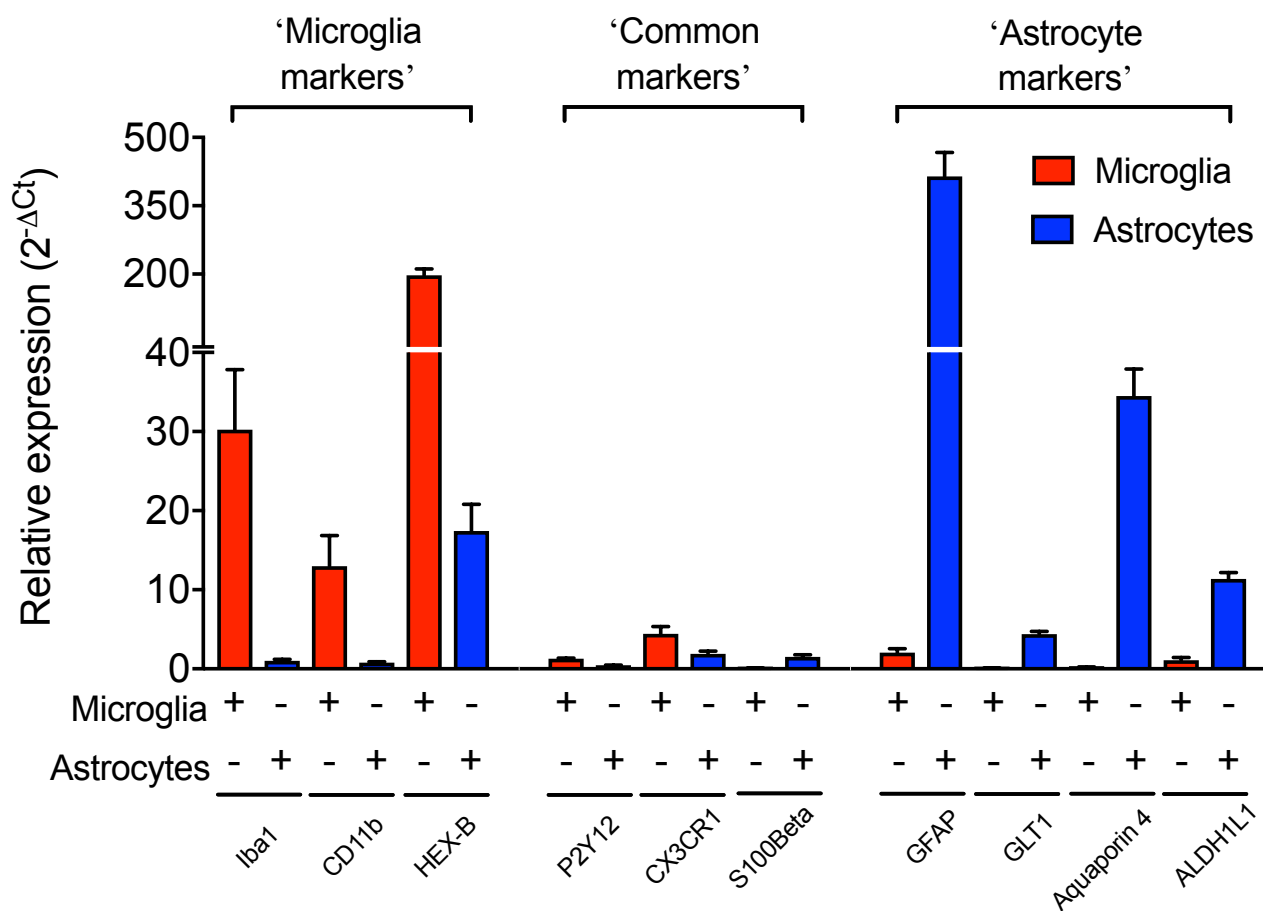

**Figure S1. Relative transcriptional expression of microglia and astrocyte markers in microglia and astrocyte cell preparations**

The relative mRNA expression ( $2^{-\Delta C_t}$ ) of microglia markers, common markers and astrocyte markers was assessed as indicated under Materials and Methods. Bar graphs represent mean + SEM of 5 independent experiments.
